# Supplementary material for: Non-volatile natural products in plant glandular trichomes: chemistry, biological activities and biosynthesis
Source: Royal Society of Chemistry journal article supplement (doi:10.1039/c8np00077h), 2018-11-23
Supplement: c8np00077h1.pdf [file c8np00077h1.pdf]

## Supporting Information

### **Non-volatile natural products in plant glandular trichomes: chemistry, biological activities and biosynthesis**

Yan Liu,<sup>a,b,†</sup> Shu-Xi Jing,<sup>a,b,†</sup> Shi-Hong Luo<sup>c</sup> and Sheng-Hong Li<sup>\*a,b</sup>

a. State Key Laboratory of Phytochemistry and Plant Resources in West China, Kunming Institute of Botany, Chinese Academy of Sciences, Kunming 650201, P. R. China.

b. Yunnan Key Laboratory of Natural Medicinal Chemistry, Kunming 650201, P. R. China.

c. College of Bioscience and Biotechnology, Shenyang Agricultural University, Shenyang, Liaoning 110866, P. R. China.

† These authors contributed equally.

## Contents

|                                                                      |    |
|----------------------------------------------------------------------|----|
| Table S1. Names and sources of sesquiterpenoids <b>1-158</b> .....   | 2  |
| Table S2. Names and sources of diterpenoids <b>159-192</b> .....     | 9  |
| Table S3. Names and sources of sesterterpenoids <b>193-200</b> ..... | 10 |
| Table S4. Names and sources of triterpenoids <b>201-222</b> .....    | 10 |
| Table S5. Names and sources of meroterpenoids <b>223-232</b> .....   | 11 |
| Table S6. Names and sources of simple phenolics <b>233-284</b> ..... | 11 |
| Table S7. Names and sources of flavonoids <b>285-341</b> .....       | 13 |
| Table S8. Names and sources of acylsugars <b>342-416</b> .....       | 16 |
| Table S9. Names and sources of glycerides <b>417-483</b> .....       | 18 |
| Table S10. Names and sources of alkaloids <b>484-489</b> .....       | 20 |
| References: .....                                                    | 21 |

**Table S1. Names and sources of sesquiterpenoids 1-158.**

| No. | Names                                                                                   | Species                                                                     | Family     | Ref. |
|-----|-----------------------------------------------------------------------------------------|-----------------------------------------------------------------------------|------------|------|
| 1   | Glandulone A                                                                            | <i>Helianthus annuus</i>                                                    | Asteraceae | 1    |
| 2   | Glandulone C                                                                            | <i>H. annuus</i>                                                            | Asteraceae | 1    |
| 3   | Glandulone B                                                                            | <i>H. annuus</i>                                                            | Asteraceae | 1    |
| 4   | Glandulone D                                                                            | <i>H. annuus</i>                                                            | Asteraceae | 2    |
| 5   | Glandulone E                                                                            | <i>H. annuus</i>                                                            | Asteraceae | 2    |
| 6   | Glandulone F                                                                            | <i>H. annuus</i>                                                            | Asteraceae | 2    |
| 7   | Helibisabonol A                                                                         | <i>H. annuus</i>                                                            | Asteraceae | 2    |
| 8   | Helibisabonol C                                                                         | <i>H. annuus</i>                                                            | Asteraceae | 2    |
| 9   | Heliannuol A                                                                            | <i>H. annuus</i>                                                            | Asteraceae | 2    |
| 10  | Heliannuol D                                                                            | <i>H. annuus</i>                                                            | Asteraceae | 2    |
| 11  | Tomentosin                                                                              | <i>Scalesia</i> sp.                                                         | Asteraceae | 3    |
| 12  | 4-Dihydrotomentosin                                                                     | <i>Scalesia</i> sp.                                                         | Asteraceae | 3    |
| 13  | Ivalbin                                                                                 | <i>Helianthus stuebelii</i>                                                 | Asteraceae | 4    |
| 14  | 11 $\alpha$ ,13-Dihydro-4H-tomentosin                                                   | <i>Viguiera acutifolia</i> , <i>H. stuebelii</i> ,<br><i>H. sagasteguii</i> | Asteraceae | 4    |
| 15  | Xanthatin                                                                               | <i>Xanthium strumarium</i>                                                  | Asteraceae | 5    |
| 16  | Xanthinosin                                                                             | <i>X. strumarium</i>                                                        | Asteraceae | 5    |
| 17  | 8- <i>epi</i> -Xanthatin                                                                | <i>X. strumarium</i>                                                        | Asteraceae | 5    |
| 18  | Xanthumin                                                                               | <i>X. strumarium</i>                                                        | Asteraceae | 5    |
| 19  | Carabrone                                                                               | <i>Scalesia</i> sp.                                                         | Asteraceae | 3    |
| 20  | 4-Dihydrocarabrone                                                                      | <i>Scalesia</i> sp.                                                         | Asteraceae | 3    |
| 21  | 4,11,13-Trihydrocarabrone                                                               | <i>V. acutifolia</i> , <i>H. sagasteguii</i>                                | Asteraceae | 4    |
| 22  | Umbellifolide                                                                           | <i>Artemisia umbelliformis</i>                                              | Asteraceae | 6    |
| 23  | 8 $\beta$ -Angeloyloxy-9 $\beta$ ,14-dihydroxy-1(10),4(5)-trans,trans-germacradienolide | <i>Blainvillea rhomboidea</i>                                               | Asteraceae | 7    |
| 24  | 8 $\beta$ -Angeloyloxy-9 $\beta$ -hydroxy-ovatifolin                                    | <i>B. rhomboidea</i>                                                        | Asteraceae | 7    |
| 25  | 8 $\beta$ -Tigloyloxy-grazielia acid                                                    | <i>B. rhomboidea</i>                                                        | Asteraceae | 7    |
| 26  | 8 $\beta$ ,14-Dihydroxy costunolide                                                     | <i>Helianthus tuberosus</i>                                                 | Asteraceae | 8    |
| 27  | Desacetyleupaserrin                                                                     | <i>H. tuberosus</i>                                                         | Asteraceae | 8    |
| 28  | Mollisorin B 2'S,3'S stereoisomer                                                       | <i>H. tuberosus</i>                                                         | Asteraceae | 8    |
| 29  | 8 $\beta$ -(4'-Hydroxy)tiglinoyloxy-ovatifolin                                          | <i>V. radula</i>                                                            | Asteraceae | 9    |

|    |                                                                                                                                      |                                   |            |    |
|----|--------------------------------------------------------------------------------------------------------------------------------------|-----------------------------------|------------|----|
| 30 | 2'S,3'S-Epang-8 $\beta$ -<br>Epoxyangeloyloxy-<br>ovatifolin                                                                         | <i>V. radula</i>                  | Asteraceae | 9  |
| 31 | 2'R,3'R-Epang-9 $\beta$ -<br>Epoxyangeloyloxy-<br>ovatifolin                                                                         | <i>V. radula</i>                  | Asteraceae | 9  |
| 32 | 2 $\alpha$ -Hydroxy-9 $\beta$ -O-<br>methylbutanoyl-<br>1(10),4,11(13)-<br>germacatrien, 6 $\alpha$ ,12-olide                        | <i>V. quinqueremis</i>            | Asteraceae | 10 |
| 33 | 2 $\alpha$ -Hydroxy-9 $\beta$ -O-angeloyl-<br>1(10),4,11(13)-<br>germacatrien, 6 $\alpha$ ,12-olide                                  | <i>V. quinqueremis</i>            | Asteraceae | 10 |
| 34 | 2 $\alpha$ ,3 $\beta$ -Dihydroxy-8 $\beta$ -<br>methacryloyloxy-germacra-<br>1(10),4,11(13)-trien-6 $\alpha$ ,12-<br>olide           | <i>V. gardneri</i>                | Asteraceae | 11 |
| 35 | Cnicin                                                                                                                               | <i>Centaurea maculosa</i>         | Asteraceae | 12 |
| 36 | Haagenolide                                                                                                                          | <i>H. annuus</i>                  | Asteraceae | 13 |
| 37 | Tagitinin C                                                                                                                          | <i>Tithonia diversifolia</i>      | Asteraceae | 14 |
| 38 | Tagitinin C methylbutyrate                                                                                                           | <i>T. diversifolia</i>            | Asteraceae | 14 |
| 39 | 15-Hydroxy-3-<br>Dehydrodesoxyfruticin                                                                                               | <i>H. annuus, V. quinqueremis</i> | Asteraceae | 10 |
| 40 | 15-Hydroxy-3-<br>dehydrodesoxy-2',3'-<br>dihydrotifruticin                                                                           | <i>V. quinqueremis</i>            | Asteraceae | 10 |
| 41 | 1 $\alpha$ ,10 $\beta$ ,15-Trihydroxy-<br>3 $\alpha$ -8 $\beta$ -O-methylbutanoyl-<br>4,11(13)-<br>germacradien,6 $\alpha$ ,12-olide | <i>V. quinqueremis</i>            | Asteraceae | 10 |
| 42 | 8 $\beta$ -Angeloyloxy-9 $\beta$ -<br>hydroxy-14- $\alpha$ -<br>acanthospermolide                                                    | <i>B. rhomboidea</i>              | Asteraceae | 7  |
| 43 | 8 $\beta$ -Angeloyloxy-14- $\alpha$ -<br>acanthospermolide                                                                           | <i>B. rhomboidea</i>              | Asteraceae | 7  |
| 44 | 8 $\beta$ -Hydroxy-9 $\beta$ -<br>angeloyloxy-14- $\alpha$ -<br>acanthospermolide                                                    | <i>B. rhomboidea</i>              | Asteraceae | 7  |
| 45 | 8 $\beta$ -Hydroxy-9 $\alpha$ -<br>angeloyloxy-14- $\alpha$ -<br>acanthospermolide                                                   | <i>B. rhomboidea</i>              | Asteraceae | 7  |
| 46 | 8 $\beta$ -Tigloyloxy-14- $\alpha$ -                                                                                                 | <i>B. rhomboidea</i>              | Asteraceae | 7  |

|    |                                                                                                                     |                                                                        |            |    |
|----|---------------------------------------------------------------------------------------------------------------------|------------------------------------------------------------------------|------------|----|
|    | acanthospermolide                                                                                                   |                                                                        |            |    |
| 47 | 8 $\beta$ -Senecioyloxy-14-oxo-<br>acanthospermolide                                                                | <i>B. rhomboidea</i>                                                   | Asteraceae | 7  |
| 48 | Uvedalin                                                                                                            | <i>Smallanthus sonchifolius</i>                                        | Asteraceae | 15 |
| 49 | Enhydrin                                                                                                            | <i>S. sonchifolius</i>                                                 | Asteraceae | 15 |
| 50 | 8,9-Epoxy-14-oxo-<br>1(10)Z,4(5)E,7(11)-<br>germacatrien-6,12-olide                                                 | <i>B. rhomboidea</i>                                                   | Asteraceae | 7  |
| 51 | 1 $\beta$ ,2 $\alpha$ -Epoxy tagitinic C                                                                            | <i>T. diversifolia</i>                                                 | Asteraceae | 14 |
| 52 | Parthenolide                                                                                                        | <i>Tanacetum parthenium</i>                                            | Asteraceae | 16 |
| 53 | Tithifolin epoxyangelate,<br>14-acetoxy                                                                             | <i>H. tuberosus</i>                                                    | Asteraceae | 8  |
| 54 | 3 $\beta$ -O-Acetyl-8 $\beta$ -<br>epoxyangeloyloxy-tithifolin                                                      | <i>V. puruana</i>                                                      | Asteraceae | 17 |
| 55 | 8 $\beta$ -Angeloyloxy-14-<br>hydroxy-tithifolin                                                                    | <i>V. radula</i>                                                       | Asteraceae | 9  |
| 56 | Argophyllin A                                                                                                       | <i>H. annuus</i>                                                       | Asteraceae | 18 |
| 57 | Argophyllin B                                                                                                       | <i>H. annuus</i>                                                       | Asteraceae | 18 |
| 58 | Erioflorin                                                                                                          | <i>Viguiera eriophora</i> ssp.<br><i>Eriophora</i> , <i>V. puruana</i> | Asteraceae | 17 |
| 59 | Acetylerioflorin                                                                                                    | <i>V. eriophora</i> ssp. <i>eriphora</i>                               | Asteraceae | 17 |
| 60 | Acetylleptocarpin                                                                                                   | <i>V. puruana</i> , <i>V. radula</i>                                   | Asteraceae | 9  |
| 61 | 3 $\beta$ -Ethoxy-leptocarpin                                                                                       | <i>V. puruana</i>                                                      | Asteraceae | 17 |
| 62 | Heliangine                                                                                                          | <i>V. puruana</i>                                                      | Asteraceae | 17 |
| 63 | 1 $\beta$ ,10 $\alpha$ -Epoxy-3 $\beta$ -hydroxy-<br>8 $\beta$ -(2'R,3'R)-<br>epoxyangeloyloxy-<br>heliangolide     | <i>V. puruana</i>                                                      | Asteraceae | 17 |
| 64 | 1 $\beta$ ,10 $\alpha$ -Epoxy-3 $\beta$ -acetoxy-<br>8 $\beta$ -(2'R,3'R)-<br>epoxyangeloyloxy-<br>heliangolide     | <i>V. puruana</i>                                                      | Asteraceae | 17 |
| 65 | 1 $\beta$ ,10 $\alpha$ -Epoxy-3 $\beta$ -<br>isobutyrate-8 $\beta$ -(2'R,3'R)-<br>epoxyangeloyloxy-<br>heliangolide | <i>V. puruana</i>                                                      | Asteraceae | 17 |
| 66 | 3 $\beta$ -(2'-Methylbutanoyloxy)-<br>8 $\beta$ -epoxyangeloyloxy-<br>leptocarpin                                   | <i>V. puruana</i>                                                      | Asteraceae | 17 |
| 67 | 1 $\beta$ ,10 $\alpha$ -Epoxy-3 $\beta$ -<br>isovalerate-8 $\beta$ -(2'R,3'R)-<br>epoxyangeloyloxy-                 | <i>V. puruana</i>                                                      | Asteraceae | 17 |

|    |                                                                                                              |                                                                                              |            |        |
|----|--------------------------------------------------------------------------------------------------------------|----------------------------------------------------------------------------------------------|------------|--------|
|    | heliangolide                                                                                                 |                                                                                              |            |        |
| 68 | 3 $\beta$ -O-Acetyl-8 $\beta$ -sarracinyloxy-leptocarpin                                                     | <i>V. puruana</i>                                                                            | Asteraceae | 17     |
| 69 | Rotundin                                                                                                     | <i>V. radula</i>                                                                             | Asteraceae | 9      |
| 70 | Tagitinin E                                                                                                  | <i>H. tuberosus</i> , <i>T. diversifolia</i>                                                 | Asteraceae | 8, 14  |
| 71 | Leptocarpin                                                                                                  | <i>H. tuberosus</i> , <i>V. eriophora</i> ssp.<br><i>Eriophora</i> , <i>V. radula</i>        | Asteraceae | 8, 9   |
| 72 | 14-Hydroxy-leptocarpin                                                                                       | <i>H. tuberosus</i> , <i>V. radula</i>                                                       | Asteraceae | 8, 9   |
| 73 | 1-O-Methyl-4,5-dihydroniveusin A                                                                             | <i>H. annuus</i>                                                                             | Asteraceae | 18, 19 |
| 74 | 4,5-Dihydro-niveusin A-methylbutyrate (enol)                                                                 | <i>H. annuus</i>                                                                             | Asteraceae | 13     |
| 75 | 1,2-Anhydrido-4,5-dihydroniveusin A                                                                          | <i>H. annuus</i> , <i>V. quinquereimis</i>                                                   | Asteraceae | 18     |
| 76 | Niveusin C                                                                                                   | <i>H. annuus</i> , <i>H. stubelii</i> , <i>V. acutifolia</i>                                 | Asteraceae | 4, 18  |
| 77 | Tagitinin F                                                                                                  | <i>T. diversifolia</i>                                                                       | Asteraceae | 14     |
| 78 | 3 $\alpha$ ,15-Dihydroxy-3,10-epoxy-8 $\beta$ -O-methylbutanoyl-1,4,11(13)-germacatrien,6 $\alpha$ ,12-olide | <i>V. quinquereimis</i> , <i>T. diversifolia</i>                                             | Asteraceae | 10     |
| 79 | 2 $\beta$ -Methoxydesoxy-tagitinin                                                                           | <i>T. diversifolia</i>                                                                       | Asteraceae | 14     |
| 80 | 8 $\beta$ -Angeloyloxy-viguilenin                                                                            | <i>V. radula</i>                                                                             | Asteraceae | 9      |
| 81 | Tagitinin A                                                                                                  | <i>T. diversifolia</i>                                                                       | Asteraceae | 14     |
| 82 | 3-O-Methyltirobundin                                                                                         | <i>T. diversifolia</i>                                                                       | Asteraceae | 14     |
| 83 | Tirobundin                                                                                                   | <i>T. diversifolia</i>                                                                       | Asteraceae | 14     |
| 84 | 1-O-Methyl-4,5-dihydroniveusin A                                                                             | <i>H. annuus</i>                                                                             | Asteraceae | 18     |
| 85 | Atripliciolide tiglata                                                                                       | <i>V. radula</i>                                                                             | Asteraceae | 9      |
| 86 | Budlein A                                                                                                    | <i>H. tuberosus</i> , <i>V. eriophora</i> ssp.<br><i>Eriophora</i> , <i>V. quinquereimis</i> | Asteraceae | 8, 17  |
| 87 | Budlein A tiglata                                                                                            | <i>H. tuberosus</i>                                                                          | Asteraceae | 8      |
| 88 | Budlein A 2-methylbutyrate                                                                                   | <i>H. tuberosus</i> , <i>V. quinquereimis</i>                                                | Asteraceae | 8, 10  |
| 89 | Budlein A isobutyrate                                                                                        | <i>H. tuberosus</i>                                                                          | Asteraceae | 8      |
| 90 | Budlein A methylacrylate                                                                                     | <i>H. tuberosus</i>                                                                          | Asteraceae | 8      |
| 91 | Budlein A isovalerate                                                                                        | <i>V. acutifolia</i> , <i>H. stubelii</i> , <i>H. sagasteguii</i>                            | Asteraceae | 4      |
| 92 | Atripliciolide 2-methylbutyrate                                                                              | <i>V. acutifolia</i> , <i>H. stubelii</i> , <i>H. sagasteguii</i>                            | Asteraceae | 4      |
| 93 | 4,15-iso-Budlein A isobutyrate                                                                               | <i>H. tuberosus</i>                                                                          | Asteraceae | 8      |
| 94 | 4,15-iso-Atripliciolide                                                                                      | <i>H. tuberosus</i>                                                                          | Asteraceae | 8      |

|     |                                                                                                                                |                                                                                                                |            |       |
|-----|--------------------------------------------------------------------------------------------------------------------------------|----------------------------------------------------------------------------------------------------------------|------------|-------|
|     | isobutyrate                                                                                                                    |                                                                                                                |            |       |
| 95  | 4,15-iso-Atripliciolide methylacrylate                                                                                         | <i>H. tuberosus</i>                                                                                            | Asteraceae | 8     |
| 96  | 4,15-iso-Atripliciolide tiglate                                                                                                | <i>H. tuberosus</i>                                                                                            | Asteraceae | 8     |
| 97  | 4,15-iso-Atripliciolide angelate                                                                                               | <i>H. tuberosus</i>                                                                                            | Asteraceae | 8     |
| 98  | 3-Hydroxy atripliciolide tiglate                                                                                               | <i>H. tuberosus</i>                                                                                            | Asteraceae | 8     |
| 99  | Ladibranolide                                                                                                                  | <i>V. radula</i>                                                                                               | Asteraceae | 9     |
| 100 | 17,18-Dehydro-viguiepinin                                                                                                      | <i>V. eriophora</i> ssp. <i>eriophora</i>                                                                      | Asteraceae | 17    |
| 101 | Calaxin                                                                                                                        | <i>V. eriophora</i> ssp. <i>eriophora</i>                                                                      | Asteraceae | 17    |
| 102 | 1-Keto-3,10-epoxy-11a-methoxymethyl-8-O-methacryloyl-15-hydroxy-2,4-germacradiene, 6,12-olide                                  | <i>V. eriophora</i> ssp. <i>eriophora</i>                                                                      | Asteraceae | 17    |
| 103 | 1-Keto-3,10-epoxy-8-O-methacryloyl-4,15-dihydroxy-5-acetoxy-2,11-germacradiene, 6,12-olide                                     | <i>V. eriophora</i> ssp. <i>eriophora</i>                                                                      | Asteraceae | 17    |
| 104 | Niveusin A isobutyrate                                                                                                         | <i>H. sagasteguii</i>                                                                                          | Asteraceae | 4     |
| 105 | Niveusin A 2-methylbutyrate                                                                                                    | <i>V. acutifolia</i> , <i>H. sagasteguii</i> , <i>V. quinquereimis</i>                                         | Asteraceae | 4, 10 |
| 106 | Niveusin B isobutyrate                                                                                                         | <i>V. acutifolia</i> , <i>H. stubelii</i> , <i>H. sagasteguii</i>                                              | Asteraceae | 4     |
| 107 | Niveusin B                                                                                                                     | <i>V. acutifolia</i> , <i>H. stubelii</i> , <i>H. sagasteguii</i> , <i>H. annuus</i> , <i>V. quinquereimis</i> | Asteraceae | 10    |
| 108 | Niveusin B 2-methylbutyrate                                                                                                    | <i>V. quinquereimis</i>                                                                                        | Asteraceae | 10    |
| 109 | 1 $\alpha$ ,3 $\alpha$ ,15-Trihydroxy-3,10-epoxy-8-O-methacryloyl-4,11-germacradiene,6,12-olide                                | <i>V. eriophora</i> ssp. <i>Eriophora</i>                                                                      | Asteraceae | 17    |
| 110 | Niveusin A                                                                                                                     | <i>V. quinquereimis</i>                                                                                        | Asteraceae | 10    |
| 111 | 1 $\alpha$ -Methoxy-3 $\alpha$ ,15-dihydroxy-3,10-epoxy-8 $\beta$ -O-methylbutanoyl-4,11(13)-germacradien,6 $\alpha$ ,12-olide | <i>V. quinquereimis</i>                                                                                        | Asteraceae | 10    |
| 112 | 1 $\alpha$ -Methoxy-3 $\alpha$ ,15-dihydroxy-3,10-epoxy-8 $\beta$ -                                                            | <i>V. quinquereimis</i>                                                                                        | Asteraceae | 10    |

---

|     |                                                                                                                                                          |                                                                            |            |    |
|-----|----------------------------------------------------------------------------------------------------------------------------------------------------------|----------------------------------------------------------------------------|------------|----|
|     | <i>O</i> -angeloyl-4,11(13)-<br>germacradien,6 $\alpha$ ,12-olide                                                                                        |                                                                            |            |    |
| 113 | 1 $\beta$ -Methoxy-3 $\alpha$ -hydroxy-<br>3,10 $\beta$ -4,5 $\alpha$ -diepoxy-8 $\beta$ -<br>isobutyroyloxy-germacra-<br>11(13)-en-6 $\alpha$ ,12-olide | <i>T. diversifolia</i>                                                     | Asteraceae | 14 |
| 114 | Prevernocistifolide-8- <i>O</i> -<br>isobutyrate                                                                                                         | <i>Vernonia galamensis</i> ssp.<br><i>galamensis</i> var. <i>ethiopica</i> | Asteraceae | 20 |
| 115 | 8 $\alpha$ -Acetoxy-10 $\alpha$ -hydroxy-<br>13- <i>O</i> -methylhirsutinolide                                                                           | <i>Chrysolaena</i> spp.                                                    | Asteraceae | 21 |
| 116 | 8 $\alpha$ ,13-Diacetoxy-10 $\alpha$ -<br>hydroxy-hirsutinolide                                                                                          | <i>Chrysolaena</i> spp.                                                    | Asteraceae | 21 |
| 117 | -                                                                                                                                                        | <i>Chrysolaena</i> spp.                                                    | Asteraceae | 21 |
| 118 | 4- <i>Oxo</i> -8 $\beta$ -isobutyroyloxy-<br>3,4-secoguaia-11(13)-en-<br>6 $\alpha$ ,12,10 $\alpha$ ,3-diolide                                           | <i>T. diversifolia</i>                                                     | Asteraceae | 14 |
| 119 | Artemisinin                                                                                                                                              | <i>Artemisia annua</i>                                                     | Asteraceae | 22 |
| 120 | Artemisitene                                                                                                                                             | <i>A. annua</i>                                                            | Asteraceae | 22 |
| 121 | 2-Methoxy-calamenene-14-<br>carboxylic acid                                                                                                              | <i>Heterotheca subaxillaris</i>                                            | Asteraceae | 23 |
| 122 | 2-Acetoxy-calamenene-14-<br>carboxylic acid                                                                                                              | <i>H. subaxillaris</i>                                                     | Asteraceae | 23 |
| 123 | 2-Hydroxy-calamenene-14-<br>carboxylic acid                                                                                                              | <i>H. subaxillaris</i>                                                     | Asteraceae | 23 |
| 124 | 2-Hydroxy-calamenene-14-<br>ol                                                                                                                           | <i>H. subaxillaris</i>                                                     | Asteraceae | 23 |
| 125 | 2-Methoxy-14-<br>calamenenone                                                                                                                            | <i>H. subaxillaris</i>                                                     | Asteraceae | 23 |
| 126 | 2-Hydroxy-14-<br>calamenenone                                                                                                                            | <i>H. subaxillaris</i>                                                     | Asteraceae | 23 |
| 127 | 7,8-Dehydro-2-hydroxy-<br>calamenene-14-ol                                                                                                               | <i>H. subaxillaris</i>                                                     | Asteraceae | 23 |
| 128 | Gerin                                                                                                                                                    | <i>Geraea viscida</i>                                                      | Asteraceae | 24 |
| 129 | 5-Desoxy-5-<br>hydroperoxytelekin                                                                                                                        | <i>A. umbelliformis</i>                                                    | Asteraceae | 6  |
| 130 | 5-Desoxy-5-hydroperoxy-<br>5-epitelekin                                                                                                                  | <i>A. umbelliformis</i>                                                    | Asteraceae | 6  |
| 131 | 1 $\alpha$ ,2-Dihydroxy-pinnatifidin                                                                                                                     | <i>H. tuberosus</i>                                                        | Asteraceae | 8  |
| 132 | 3- <i>Oxo</i> -isoalantolactone                                                                                                                          | <i>Scalesia</i> spp.                                                       | Asteraceae | 3  |
| 133 | Pinnatifidin                                                                                                                                             | <i>Scalesia</i> spp.                                                       | Asteraceae | 3  |
| 134 | 8 $\beta$ -2,3-Epoxyangeloyloxy-<br>balchanin                                                                                                            | <i>V. puruana</i>                                                          | Asteraceae | 17 |

---

|     |                                                                                                      |                                 |            |    |
|-----|------------------------------------------------------------------------------------------------------|---------------------------------|------------|----|
| 135 | Parthenin                                                                                            | <i>Parthenium hysterophorus</i> | Asteraceae | 25 |
| 136 | Ambrosin                                                                                             | <i>P. hysterophorus</i>         | Asteraceae | 25 |
| 137 | Cumambrin A                                                                                          | <i>A. nova</i>                  | Asteraceae | 26 |
| 138 | Cumambrin B                                                                                          | <i>A. nova</i>                  | Asteraceae | 26 |
| 139 | Zaluzanin C                                                                                          | <i>Scalesia stewartii</i>       | Asteraceae | 3  |
| 140 | 15-Hydroxyzaluzanin C                                                                                | <i>Sca. stewartii</i>           | Asteraceae | 3  |
| 141 | 15-Hydroxy-11,13-dihydrozaluzanin C                                                                  | <i>Sca. stewartii</i>           | Asteraceae | 3  |
| 142 | Scalesin                                                                                             | <i>Sca. stewartii</i>           | Asteraceae | 3  |
| 143 | 8 $\beta$ -Angeloyloxy-14-oxo-4 $\beta$ ,9 $\beta$ -dihydroxy-guaia-11(13)-en-6,12-olide             | <i>B. rhomboidea</i>            | Asteraceae | 7  |
| 144 | 9 $\beta$ -Angeloyloxy-14-oxo,4 $\beta$ ,8 $\beta$ -dihydroxy-guaia-11(13)-en-6,12-olide             | <i>B. rhomboidea</i>            | Asteraceae | 7  |
| 145 | 2-One-8 $\beta$ -methacryloyloxy-guaia-1(10),3,11(13)-trien-6 $\alpha$ ,12-olide                     | <i>V. gardneri</i>              | Asteraceae | 11 |
| 146 | 2-One-8 $\beta$ -tigloyloxy-guaia-1(10),3,11(13)-trien-6 $\alpha$ ,12-olide                          | <i>V. gardneri</i>              | Asteraceae | 11 |
| 147 | 2-One-8 $\beta$ -methacryloyloxy-10 $\beta$ -hydroxy-guaia-3,11(13)-dien-6 $\alpha$ ,12-olide        | <i>V. gardneri</i>              | Asteraceae | 11 |
| 148 | 2-One-8 $\beta$ -methacryloyloxy-10 $\alpha$ -hydroxy-guaia-3,11(13)-dien-6 $\alpha$ ,12-olide       | <i>V. gardneri</i>              | Asteraceae | 11 |
| 149 | 2-One-8 $\beta$ -methacryloyloxy-guaia-3,10(14),11(13)-trien-6 $\alpha$ ,12-olide                    | <i>V. gardneri</i>              | Asteraceae | 11 |
| 150 | 3-Hydroxy-8 $\beta$ -isobutyryloxydehydroleucodin                                                    | <i>T. diversifolia</i>          | Asteraceae | 14 |
| 151 | 4 $\beta$ ,10 $\alpha$ -Dihydroxy-3-oxo-8 $\beta$ -isobutyryloxyguaia-11(13)-en-12,6 $\alpha$ -olide | <i>T. diversifolia</i>          | Asteraceae | 14 |
| 152 | 8 $\beta$ -Angeloyloxy-9 $\beta$ -hydroxy-guaia-11(13)-en-6(12),4(14)-diolide                        | <i>B. rhomboidea</i>            | Asteraceae | 7  |
| 153 | 8 $\beta$ -Angeloyloxy-9 $\beta$ -hydroxy-guaia-13-methoxy-6(12),4(14)-diolide                       | <i>B. rhomboidea</i>            | Asteraceae | 7  |



|     |                                                                                                                           |                                 |             |    |
|-----|---------------------------------------------------------------------------------------------------------------------------|---------------------------------|-------------|----|
| 154 | (-)-epi- $\alpha$ -Bisabolol 6-deoxy- $\beta$ -D-gulopyranodide                                                           | <i>Brillantaisia owariensis</i> | Acanthaceae | 27 |
| 155 | 2-O-(6'-O-Malonyl- $\beta$ -D-glucopyranosyl), 12-O-( $\beta$ -D-glucopyranosyl)-campherenane-2-endo,12-diol              | <i>Solanum habrochaites</i>     | Solanaceae  | 28 |
| 156 | 12-O-(6'-O-Malonyl- $\beta$ -D-glucopyranosyl)-campherenane-2-endo,12-diol                                                | <i>S. habrochaites</i>          | Solanaceae  | 28 |
| 157 | 2,12-Bis-O-( $\beta$ -D-glucopyranosyl)-campherenane-2-endo,12-diol                                                       | <i>S. habrochaites</i>          | Solanaceae  | 28 |
| 158 | 12-O-(6''-O-Acetyl- $\beta$ -D-glucopyranosyl-(1 $\rightarrow$ 2)- $\beta$ -D-glucopyranosyl)-campherenane-2-endo,12-diol | <i>S. habrochaites</i>          | Solanaceae  | 28 |

**Table S2. Names and sources of diterpenoids 159-192.**

| No. | Names                                                                                                              | Species                      | Family      | Ref. |
|-----|--------------------------------------------------------------------------------------------------------------------|------------------------------|-------------|------|
| 159 | $\alpha$ -4,8,13-Duvatriene-1,3-diol (DVT)                                                                         | <i>Nicotiana tabacum</i>     | Solanaceae  | 29   |
| 160 | $\beta$ -4,8,13-Duvatriene-1,3-diol                                                                                | <i>N. tabacum</i>            | Solanaceae  | 29   |
| 161 | $\alpha$ -4,8,13-Duvatriene-ol                                                                                     | <i>N. tabacum</i>            | Solanaceae  | 29   |
| 162 | $\beta$ -4,8,13-Duvatriene-ol                                                                                      | <i>N. tabacum</i>            | Solanaceae  | 29   |
| 163 | (1 <i>S</i> ,2 <i>E</i> ,4 <i>R</i> ,6 <i>R</i> ,7 <i>E</i> ,11 <i>E</i> )-2,7,11-Cembratriene-4,6-diol (CBT-diol) | <i>N. tabacum</i>            | Solanaceae  | 30   |
| 164 | (1 <i>S</i> ,2 <i>E</i> ,4 <i>S</i> ,6 <i>R</i> ,7 <i>E</i> ,11 <i>E</i> )-2,7,11-Cembratriene-4,6-diol            | <i>N. tabacum</i>            | Solanaceae  | 30   |
| 165 | (-)-Kolavenol                                                                                                      | <i>Salvia divinorum</i>      | Lamiaceae   | 31   |
| 166 | <i>cis</i> -Abienol                                                                                                | <i>N. tabacum</i>            | Solanaceae  | 32   |
| 167 | 15-Hydroxy abienol                                                                                                 | <i>N. tabacum</i>            | Solanaceae  | 32   |
| 168 | (-)-Sclareol                                                                                                       | <i>Salvia sclarea</i>        | Lamiaceae   | 33   |
| 169 | Paraguhenryisin A                                                                                                  | <i>Paragutzlaffia henryi</i> | Acanthaceae | 34   |
| 170 | Paraguhenryisin B                                                                                                  | <i>P. henryi</i>             | Acanthaceae | 34   |
| 171 | Paraguhenryisin C                                                                                                  | <i>P. henryi</i>             | Acanthaceae | 34   |
| 172 | Paraguhenryisin D                                                                                                  | <i>P. henryi</i>             | Acanthaceae | 34   |

|     |                                                         |                                                                                                                                                                                      |             |           |
|-----|---------------------------------------------------------|--------------------------------------------------------------------------------------------------------------------------------------------------------------------------------------|-------------|-----------|
| 173 | Physacoztomatin                                         | <i>P. henryi</i>                                                                                                                                                                     | Acanthaceae | 34        |
| 174 | Leoheterin                                              | <i>Leonurus japonicus</i>                                                                                                                                                            | Lamiaceae   | 35        |
| 175 | Galeopsin                                               | <i>L. japonicus</i>                                                                                                                                                                  | Lamiaceae   | 35        |
| 176 | Vitexilactone                                           | <i>Vitex agnus-castus</i>                                                                                                                                                            | Lamiaceae   | 36        |
| 177 | Seguiniilactone A                                       | <i>Colquhounia seguinii</i>                                                                                                                                                          | Lamiaceae   | 37        |
| 178 | Seguiniilactone B                                       | <i>C. seguinii</i>                                                                                                                                                                   | Lamiaceae   | 37        |
| 179 | Seguiniilactone C                                       | <i>C. seguinii</i>                                                                                                                                                                   | Lamiaceae   | 37        |
| 180 | (-)-Hardwickiic acid                                    | <i>S. divinorum</i>                                                                                                                                                                  | Lamiaceae   | 31        |
| 181 | Salvianduline D                                         | <i>Salvia blepharophylla</i>                                                                                                                                                         | Lamiaceae   | 38        |
| 182 | Salvinorin A                                            | <i>S. divinorum</i>                                                                                                                                                                  | Lamiaceae   | 39        |
| 183 | Salvinorin B                                            | <i>S. divinorum</i>                                                                                                                                                                  | Lamiaceae   | 39        |
| 184 | Salvinorin C                                            | <i>S. divinorum</i>                                                                                                                                                                  | Lamiaceae   | 39        |
| 185 | Salvinorin D                                            | <i>S. divinorum</i>                                                                                                                                                                  | Lamiaceae   | 39        |
| 186 | Carnosic acid                                           | <i>Rosmarinus officinalis</i>                                                                                                                                                        | Lamiaceae   | 40        |
| 187 | Carnosol                                                | <i>R. officinalis</i>                                                                                                                                                                | Lamiaceae   | 40        |
| 188 | <i>ent</i> -Kaurenoic acid                              | <i>T. diversifolia</i> , <i>M.</i><br><i>tomentosa</i> , <i>P.</i><br><i>sonchifolia</i> , <i>P.</i><br><i>cheiranthifolium</i> , <i>P. vira</i><br><i>vira</i> , <i>P. robustum</i> | Asteraceae  | 14,<br>41 |
| 189 | Grandiflorenic acid                                     | <i>Montanoa tomentosa</i>                                                                                                                                                            | Asteraceae  | 41        |
| 190 | <i>ent</i> -Kaur-16-en-19-oic acid 15-angeloyloxy ester | <i>Polymnia sonchifolia</i>                                                                                                                                                          | Asteraceae  | 42        |
| 191 | 18-Angeloyloxy- <i>ent</i> -kaur-16-en-19-oic acid      | <i>P. sonchifolia</i>                                                                                                                                                                | Asteraceae  | 42        |
| 192 | 15-Angeloyloxy-16,17-epoxy-19-kauronic acid             | <i>P. sonchifolia</i>                                                                                                                                                                | Asteraceae  | 42        |

**Table S3. Names and sources of sesterterpenoids 193-200.**

| No. | Names                          | Species                                        | Family    | Ref. |
|-----|--------------------------------|------------------------------------------------|-----------|------|
| 193 | Leucosceptroid A               | <i>Leucosceptrum canum</i>                     | Lamiaceae | 43   |
| 194 | Leucosceptroid B               | <i>L. canum</i>                                | Lamiaceae | 43   |
| 195 | 11- $\beta$ H-Leucosceptroid B | <i>L. canum</i>                                | Lamiaceae | 44   |
| 196 | Leucosceptroid J               | <i>L. canum</i>                                | Lamiaceae | 44   |
| 197 | Leucosceptroid I               | <i>L. canum</i>                                | Lamiaceae | 44   |
| 198 | Colquhounoid A                 | <i>Colquhounia coccinea</i> var. <i>mollis</i> | Lamiaceae | 45   |
| 199 | Colquhounoid B                 | <i>C. coccinea</i> var. <i>mollis</i>          | Lamiaceae | 45   |
| 200 | Colquhounoid C                 | <i>C. coccinea</i> var. <i>mollis</i>          | Lamiaceae | 45   |

**Table S4. Names and sources of triterpenoids 201-222.**

| No. | Names                                              | Species                                      | Family       | Ref. |
|-----|----------------------------------------------------|----------------------------------------------|--------------|------|
| 201 | Ursolic acid                                       | <i>Salvia</i><br><i>blepharophylla</i>       | Lamiaceae    | 38   |
| 202 | $\alpha$ -Amyrin                                   | <i>S. blepharophylla</i>                     | Lamiaceae    | 38   |
| 203 | (2 $\alpha$ ,20S)-2,20-Dihydroxydammar-24-en-3-one | <i>Cerasus</i><br><i>yedoensis</i>           | Rosaceae     | 46   |
| 204 | (20S)-20-Hydroxydammar-24-en-3-one                 | <i>C. yedoensis</i>                          | Rosaceae     | 46   |
| 205 | Betulafolienetriol                                 | <i>Proboscidea</i><br><i>louisiana</i>       | Martyniaceae | 47   |
| 206 | Probosciderol A                                    | <i>P. louisiana</i>                          | Martyniaceae | 47   |
| 207 | Probosciderol B                                    | <i>P. louisiana</i>                          | Martyniaceae | 47   |
| 208 | Probosciderol C                                    | <i>P. louisiana</i>                          | Martyniaceae | 47   |
| 209 | Probosciderol D                                    | <i>P. louisiana</i>                          | Martyniaceae | 47   |
| 210 | Probosciderol F                                    | <i>P. louisiana</i>                          | Martyniaceae | 47   |
| 211 | Probosciderol E                                    | <i>P. louisiana</i>                          | Martyniaceae | 47   |
| 212 | Probosciderol G                                    | <i>P. louisiana</i>                          | Martyniaceae | 47   |
| 213 | Probosciderol H                                    | <i>P. louisiana</i>                          | Martyniaceae | 47   |
| 214 | Probosciderol I                                    | <i>P. louisiana</i>                          | Martyniaceae | 47   |
| 215 | Probosciderol L                                    | <i>P. louisiana</i>                          | Martyniaceae | 47   |
| 216 | Probosciderol J                                    | <i>P. louisiana</i>                          | Martyniaceae | 47   |
| 217 | Probosciderol K                                    | <i>P. louisiana</i>                          | Martyniaceae | 47   |
| 218 | Betulatrierpene C 3-acetate                        | <i>Ibicella lutea</i>                        | Martyniaceae | 47   |
| 219 | 24- <i>epi</i> -Polacandrin 1,3-diacetate          | <i>I. lutea</i>                              | Martyniaceae | 47   |
| 220 | Betulatrierpene C                                  | <i>I. lutea</i>                              | Martyniaceae | 47   |
| 221 | 24- <i>epi</i> -Polacandrin 3-acetate              | <i>I. lutea</i>                              | Martyniaceae | 47   |
| 222 | Papyriferic acid                                   | <i>B. neoalaskana</i> ,<br><i>B. pendula</i> | Betulaceae   | 48   |

**Table S5. Names and sources of meroterpenoids 223-232.**

| No. | Names                                               | Species                | Family      | Ref. |
|-----|-----------------------------------------------------|------------------------|-------------|------|
| 223 | $\Delta^9$ -Tetrahydrocannabinolic acid (THCA)      | <i>Cannabis sativa</i> | Cannabaceae | 49   |
| 224 | $\Delta^9$ -Tetrahydrocannabinol ( $\Delta^9$ -THC) | <i>C. sativa</i>       | Cannabaceae | 49   |
| 225 | Cannabidiolic acid (CBDA)                           | <i>C. sativa</i>       | Cannabaceae | 49   |
| 226 | Cannabidiol (CBD)                                   | <i>C. sativa</i>       | Cannabaceae | 49   |
| 227 | Cannabigerolic acid (CBGA)                          | <i>C. sativa</i>       | Cannabaceae | 49   |
| 228 | Cannabigerol (CBG)                                  | <i>C. sativa</i>       | Cannabaceae | 49   |
| 229 | Cannabichromenic acid (CBCA)                        | <i>C. sativa</i>       | Cannabaceae | 49   |
| 230 | Cannabichromene (CBC)                               | <i>C. sativa</i>       | Cannabaceae | 49   |

|     |                  |                            |               |    |
|-----|------------------|----------------------------|---------------|----|
| 231 | Cannabinol (CBN) | <i>C. sativa</i>           | Cannabaceae   | 49 |
| 232 | Vedelianin       | <i>Macaranga vedeliana</i> | Euphorbiaceae | 50 |

**Table S6. Names and sources of simple phenolics 233-284.**

| No. | Names                                                 | Species                                                     | Family          | Ref.   |
|-----|-------------------------------------------------------|-------------------------------------------------------------|-----------------|--------|
| 233 | Geranylgeranylhydroquinone                            | <i>Phacelia minor</i> , <i>P. parryi</i>                    | Hydrophyllaceae | 51     |
| 234 | 1-Oxofarnesylhydroquinone(= 2-Farnesoyl-hydroquinone) | <i>P. minor</i> , <i>P. parryi</i> , <i>P. campanularia</i> | Hydrophyllaceae | 51     |
| 235 | 5-Farnesoyl-1,2,4-trihydroxybenzene                   | <i>P. campanularia</i>                                      | Hydrophyllaceae | 52     |
| 236 | Geranylhydroquinone                                   | <i>P. crenulata</i>                                         | Hydrophyllaceae | 53     |
| 237 | 3-Geranyl-2,5-dihydroxyphenyl acetate                 | <i>P. ixodes</i>                                            | Hydrophyllaceae | 54     |
| 238 | 2-Geranyl-4-hydroxyphenyl acetate                     | <i>P. ixodes</i>                                            | Hydrophyllaceae | 54     |
| 239 | 2,4-Dihydroxy-6-geranylphenyl acetate                 | <i>P. pedicellata</i>                                       | Hydrophyllaceae | 52     |
| 240 | Geranylbenzoquinone                                   | <i>P. ixodes</i>                                            | Hydrophyllaceae | 54     |
| 241 | 2-Geranyl-6-hydroxy-4-methoxyphenyl acetate           | <i>P. ixodes</i>                                            | Hydrophyllaceae | 54     |
| 242 | 6-Hydroxy-2-methyl-2-(4-methyl-3-pentenyl)-chromene   | <i>P. ixodes</i>                                            | Hydrophyllaceae | 54     |
| 243 | 6-Farnesyl-1,2,4-trihydroxybenzene                    | <i>P. campanularia</i>                                      | Hydrophyllaceae | 52     |
| 244 | 5-Farnesyl-1,2,4-trihydroxybenzene                    | <i>P. campanularia</i>                                      | Hydrophyllaceae | 52     |
| 245 | 3-Farnesyl-4-hydroxybenzoic acid                      | <i>P. pedicellata</i>                                       | Hydrophyllaceae | 52     |
| 246 | 6 <i>E</i> -Turriculoic acid A                        | <i>Turricula parryi</i>                                     | Hydrophyllaceae | 55     |
| 247 | 6 <i>E</i> -Turriculoic acid B                        | <i>T. parryi</i>                                            | Hydrophyllaceae | 55     |
| 248 | Turriculoic acid C                                    | <i>T. parryi</i>                                            | Hydrophyllaceae | 55     |
| 249 | Turriculol F                                          | <i>T. parryi</i>                                            | Hydrophyllaceae | 55     |
| 250 | 6 <i>Z</i> -Turriculoic acid A                        | <i>T. parryi</i>                                            | Hydrophyllaceae | 55     |
| 251 | 6 <i>Z</i> -Turriculoic acid B                        | <i>T. parryi</i>                                            | Hydrophyllaceae | 55     |
| 252 | Turriculoic acid D                                    | <i>T. parryi</i>                                            | Hydrophyllaceae | 55     |
| 253 | Turriculol E                                          | <i>T. parryi</i>                                            | Hydrophyllaceae | 55     |
| 254 | 3-Farnesyl-4-hydroxybenzoic acid                      | <i>T. parryi</i> , <i>P. pedicellata</i>                    | Hydrophyllaceae | 55     |
| 255 | 6-[( <i>Z</i> )-10'-Pentadecenyl]salicylic acid       | <i>Pelargonium hortorum</i>                                 | Geraniaceae     | 56, 57 |

|     |                                                                        |                                                                    |                 |        |
|-----|------------------------------------------------------------------------|--------------------------------------------------------------------|-----------------|--------|
| 256 | 6-[(Z)-12'-Heptadecenyl]salicylic acid                                 | <i>P. hortorum</i>                                                 | Geraniaceae     | 56, 57 |
| 257 | Romanicardic acid                                                      | <i>P. hortorum</i>                                                 | Geraniaceae     | 56     |
| 258 | Geranicardic acid                                                      | <i>P. hortorum</i>                                                 | Geraniaceae     | 56     |
| 259 | 22:0 Anacardic acid                                                    | <i>P. hortorum</i>                                                 | Geraniaceae     | 58, 59 |
| 260 | 24:0 Anacardic acid                                                    | <i>P. hortorum</i>                                                 | Geraniaceae     | 58, 59 |
| 261 | Primin                                                                 | <i>Primula obconica</i>                                            | Primulaceae     | 60     |
| 262 | Aspidinol B                                                            | <i>Dryopteris villarii</i>                                         | Pteridaceae     | 61     |
| 263 | 4-Hydroxy-3-(2,3-dihydroxy-3-methylbutyl)-benzoic acid methyl ester    | <i>Eriodictyon sessilifolium</i>                                   | Hydrophyllaceae | 62     |
| 264 | Methyl-2-(1-hydroxy-1-methylethyl)-2,3-dihydrobenzofuran-5-carboxylate | <i>E. sessilifolium</i>                                            | Hydrophyllaceae | 62     |
| 265 | 2,2-Dimethyl-3-hydroxychroman-6-carboxylic acid methyl ester           | <i>E. sessilifolium</i>                                            | Hydrophyllaceae | 62     |
| 266 | 2,3-Dihydro-12,13-dihydroxy euparin                                    | <i>Heliunthus stuebelii</i>                                        | Asteraceae      | 4      |
| 267 | 2,3-Dehydro-2-[2-propanyl-1-ol] tremeton                               | <i>H. stuebelii</i>                                                | Asteraceae      | 4      |
| 268 | 2,3-Dehydro-2-[2-propanyl-3-ol]-tremeton                               | <i>V. acutifolia</i> , <i>H. stuebelii</i> , <i>H. sagasteguii</i> | Asteraceae      | 4      |
| 269 | 2,3-Dehydro-2-[2-propanyl-2,3-epoxi-1-ol]-tremeton                     | <i>H. stuebelii</i>                                                | Asteraceae      | 4      |
| 270 | 5-Hydroxy-2,3,4-trimethoxy-9,10-dihydrophenanthrene                    | <i>E. nigrum</i>                                                   | Empetraceae     | 63     |
| 271 | 4,5-Dihydroxy-2,3-dimethoxy-9,10-dihydrophenanthrene                   | <i>E. nigrum</i>                                                   | Empetraceae     | 63     |
| 272 | Humulone ( $\alpha$ -bitter acid)                                      | <i>Humulus lupulus</i>                                             | Cannabaceae     | 64     |
| 273 | Lupulone ( $\beta$ -bitter acid)                                       | <i>H. lupulus</i>                                                  | Cannabaceae     | 64     |
| 274 | Para-aspidin AA                                                        | <i>Dryopteris arguta</i>                                           | Pteridaceae     | 61     |
| 275 | Desaspidin AA                                                          | <i>D. arguta</i>                                                   | Pteridaceae     | 61     |
| 276 | Desaspidin AP                                                          | <i>D. arguta</i>                                                   | Pteridaceae     | 61     |
| 277 | Desaspidin AB                                                          | <i>D. arguta</i>                                                   | Pteridaceae     | 61     |
| 278 | Desaspidin PB                                                          | <i>D. arguta</i>                                                   | Pteridaceae     | 61     |
| 279 | Albaspidin AA                                                          | <i>D. villarii</i>                                                 | Pteridaceae     | 61     |
| 280 | Albaspidin AP                                                          | <i>D. villarii</i>                                                 | Pteridaceae     | 61     |
| 281 | Albaspidin PP                                                          | <i>D. villarii</i>                                                 | Pteridaceae     | 61     |
| 282 | Albaspidin AB                                                          | <i>D. villarii</i>                                                 | Pteridaceae     | 61     |

|     |               |                    |             |    |
|-----|---------------|--------------------|-------------|----|
| 283 | Albaspidin PB | <i>D. villarii</i> | Pteridaceae | 61 |
| 284 | Albaspidin BB | <i>D. villarii</i> | Pteridaceae | 61 |

**Table S7. Names and sources of flavonoids 285-341.**

| No. | Names                                                                     | Species                                                                                                                        | Family                    | Ref.     |
|-----|---------------------------------------------------------------------------|--------------------------------------------------------------------------------------------------------------------------------|---------------------------|----------|
| 285 | Naringenin                                                                | <i>Scalesia baurii</i> ssp.<br><i>Hopkinsii</i> , <i>Betula</i> spp.                                                           | Asteraceae,<br>Betulaceae | 3,<br>65 |
| 286 | 6-Methoxynaringenin                                                       | <i>S. baurii</i> ssp. <i>hopkinsii</i>                                                                                         | Asteraceae                | 3        |
| 287 | 2,3-Dihydro-5,7,4'-trihydroxy-3,6-dimethoxy-flavonol                      | <i>Scalesia stewartii</i>                                                                                                      | Asteraceae                | 3        |
| 288 | (2 <i>R</i> ,3 <i>R</i> )-2,3-Dihydro-5,7,4'-trihydroxy-6-methoxyflavonol | <i>Sca. stewartii</i>                                                                                                          | Asteraceae                | 3        |
| 289 | Nevadensin                                                                | <i>Helianthus annuus</i>                                                                                                       | Asteraceae                | 2        |
| 290 | Desmethoxysudachitin                                                      | <i>H. annuus</i>                                                                                                               | Asteraceae                | 2        |
| 291 | 5,7,3'-Trihydroxy-6,8,4'-trimethoxyflavone                                | <i>H. annuus</i>                                                                                                               | Asteraceae                | 2        |
| 292 | Xanthomicrol                                                              | <i>H. annuus</i>                                                                                                               | Asteraceae                | 2        |
| 293 | Gardenin B                                                                | <i>H. annuus</i>                                                                                                               | Asteraceae                | 2        |
| 294 | Sideritiflavone                                                           | <i>H. annuus</i>                                                                                                               | Asteraceae                | 2        |
| 295 | Methylsudachitin                                                          | <i>H. annuus</i>                                                                                                               | Asteraceae                | 2        |
| 296 | 5-Deoxy-flavenone                                                         | <i>H. annuus</i>                                                                                                               | Asteraceae                | 2        |
| 297 | Hispidulin                                                                | <i>H. angustifolius</i> , <i>H. floridanus</i> , <i>H. simulans</i> , <i>T. diversifolia</i> , <i>Heterotheca subaxillaris</i> | Asteraceae                | 66       |
| 298 | Nepetin                                                                   | <i>H. angustifolius</i> , <i>H. floridanus</i> , <i>H. simulans</i>                                                            | Asteraceae                | 66       |
| 299 | Jaceosidin                                                                | <i>H. angustifolius</i> , <i>H. floridanus</i> , <i>H. simulans</i>                                                            | Asteraceae                | 66       |
| 300 | Hymenoxin                                                                 | <i>H. angustifolius</i> , <i>H. floridanus</i> , <i>H. simulans</i>                                                            | Asteraceae                | 66       |
| 301 | Chrysin                                                                   | <i>Lychnophora ericoides</i>                                                                                                   | Asteraceae                | 67       |
| 302 | Pinocembrin                                                               | <i>Pseudognaphalium robustum</i> , <i>L. ericoides</i>                                                                         | Asteraceae                | 67, 68   |
| 303 | Pinostrobin                                                               | <i>L. ericoides</i>                                                                                                            | Asteraceae                | 67       |
| 304 | Pinobanksin                                                               | <i>L. ericoides</i>                                                                                                            | Asteraceae                | 67       |
| 305 | 3- <i>O</i> -Acetylpinobanksin                                            | <i>L. ericoides</i>                                                                                                            | Asteraceae                | 67       |
| 306 | Artemetin                                                                 | <i>Laggera pterodonta</i>                                                                                                      | Asteraceae                | 69       |
| 307 | 5-Hydroxy-3,4',6,7-tetramethoxyflavone                                    | <i>L. pterodonta</i>                                                                                                           | Asteraceae                | 69       |
| 308 | Casticin                                                                  | <i>L. pterodonta</i>                                                                                                           | Asteraceae                | 69       |

|            |                                                                                                  |                                 |                  |    |
|------------|--------------------------------------------------------------------------------------------------|---------------------------------|------------------|----|
| <b>309</b> | Penduletin                                                                                       | <i>L. pterodonta</i>            | Asteraceae       | 69 |
| <b>310</b> | Eupatilin                                                                                        | <i>A. umbelliformis</i>         | Asteraceae       | 6  |
| <b>311</b> | Apigenin                                                                                         | <i>Betula</i> spp.              | Betulaceae       | 65 |
| <b>312</b> | Kaempferol                                                                                       | <i>Betula</i> spp.              | Betulaceae       | 65 |
| <b>313</b> | Acacetin                                                                                         | <i>Betula</i> spp.              | Betulaceae       | 65 |
| <b>314</b> | Centaureidin                                                                                     | <i>Heterotheca subaxillaris</i> | Asteraceae       | 23 |
| <b>315</b> | Pectolarigenin                                                                                   | <i>H. subaxillaris</i>          | Asteraceae       | 23 |
| <b>316</b> | Sorbifolin                                                                                       | <i>H. subaxillaris</i>          | Asteraceae       | 23 |
| <b>317</b> | Nuchensin                                                                                        | <i>S. blepharophylla</i>        | Lamiaceae        | 38 |
| <b>318</b> | Pedalitin                                                                                        | <i>S. blepharophylla</i>        | Lamiaceae        | 38 |
| <b>319</b> | 6-Geranyl-5,7-dihydroxy-3',4'-dimethoxyflavanone                                                 | <i>Paulownia tomentosa</i>      | Scrophulariaceae | 70 |
| <b>320</b> | 6-Geranyl-3',5,7-trihydroxy-4'-methoxyflavanone                                                  | <i>P. tomentosa</i>             | Scrophulariaceae | 70 |
| <b>321</b> | 6-Geranyl-4',5,7-trihydroxy-3',5'-dimethoxyflavanone                                             | <i>P. tomentosa</i>             | Scrophulariaceae | 70 |
| <b>322</b> | 6-Geranyl-4',5,5',7-tetrahydroxy-3'-methoxyflavanone                                             | <i>P. tomentosa</i>             | Scrophulariaceae | 70 |
| <b>323</b> | 6-Geranyl-4',5,7-trihydroxy-3'-methoxyflavanone                                                  | <i>P. tomentosa</i>             | Scrophulariaceae | 70 |
| <b>324</b> | Diplacone                                                                                        | <i>P. tomentosa</i>             | Scrophulariaceae | 70 |
| <b>325</b> | 3,4',5,5',7-Pentahydroxy-3'-methoxy-6-(3-methyl-2-butenyl)flavanone                              | <i>P. tomentosa</i>             | Scrophulariaceae | 70 |
| <b>326</b> | 6-Geranyl-3,3',5,7-tetrahydroxy-4'-methoxyflavanone                                              | <i>P. tomentosa</i>             | Scrophulariaceae | 70 |
| <b>327</b> | 6-Geranyl-3,4',5,7-tetrahydroxy-3'-methoxyflavane                                                | <i>P. tomentosa</i>             | Scrophulariaceae | 70 |
| <b>328</b> | Diplacol                                                                                         | <i>P. tomentosa</i>             | Scrophulariaceae | 70 |
| <b>329</b> | 4',5,5',7-Tetrahydroxy-6-[6-hydroxy-3,7-dimethyl-2( <i>E</i> ),7-octadienyl]-3'-methoxyflavanone | <i>P. tomentosa</i>             | Scrophulariaceae | 70 |
| <b>330</b> | 3',4',5,7-tetrahydroxy-6-[6-hydroxy-3,7-dimethyl-2( <i>E</i> ),7-octadienyl]flavanone            | <i>P. tomentosa</i>             | Scrophulariaceae | 70 |
| <b>331</b> | 3,3',4',5,7-Pentahydroxy-6-[6-hydroxy-3,7-dimethyl-2( <i>E</i> ),7-octadienyl]flavanone          | <i>P. tomentosa</i>             | Scrophulariaceae | 70 |
| <b>332</b> | 3,3',4',5,7-Pentahydroxy-6-[7-hydroxy-3,7-dimethyl-2( <i>E</i> )-octenyl]flavanone               | <i>P. tomentosa</i>             | Scrophulariaceae | 70 |
| <b>333</b> | 3',4',5,7-Pentahydroxy-6-[7-                                                                     | <i>P. tomentosa</i>             | Scrophulariaceae | 70 |

|            |                                                          |                        |             |    |
|------------|----------------------------------------------------------|------------------------|-------------|----|
|            | hydroxy-3,7-dimethyl-2( <i>E</i> )-<br>octenyl]flavanone |                        |             |    |
| <b>334</b> | Xanthohumol                                              | <i>H. lupulus</i>      | Cannabaceae | 64 |
| <b>335</b> | 2',4'-Dihydroxychalcone                                  | <i>Empetrum nigrum</i> | Empetraceae | 63 |
| <b>336</b> | 2'-Hydroxy-4'-methoxychalcone                            | <i>E. nigrum</i>       | Empetraceae | 63 |
| <b>337</b> | 2',4'-Dihydroxydihydrochalcone                           | <i>E. nigrum</i>       | Empetraceae | 63 |
| <b>338</b> | 4'-Hydroxy-2'-methoxy-<br>dihydrochalcone                | <i>E. nigrum</i>       | Empetraceae | 63 |
| <b>339</b> | 2'-Hydroxy-4'-methoxy-<br>dihydrochalcone                | <i>E. nigrum</i>       | Empetraceae | 63 |
| <b>340</b> | 2',4'-Dihydroxy-6'-methoxy-<br>dihydrochalcone           | <i>E. nigrum</i>       | Empetraceae | 63 |
| <b>341</b> | 2'-Hydroxy-4',6'-dimethoxy-<br>dihydrochalcone           | <i>E. nigrum</i>       | Empetraceae | 63 |

**Table S8. Names and sources of acylsugars 342-416.**

| <b>No.</b> | <b>Names</b>                                                                            | <b>Species</b>               | <b>Family</b> | <b>Ref.</b> |
|------------|-----------------------------------------------------------------------------------------|------------------------------|---------------|-------------|
| <b>342</b> | 6 <i>S</i> -(6- <i>O</i> -Acetyl- $\beta$ -D-<br>glucopyranosyloxy)octadecanoic<br>acid | <i>Ibicella lutea</i>        | Martyniaceae  | 47          |
| <b>343</b> | 6 <i>S</i> -(6- <i>O</i> -Acetyl- $\beta$ -D-<br>glucopyranosyloxy)eicosanoic<br>acid   | <i>I. lutea</i>              | Martyniaceae  | 47          |
| <b>344</b> | 6 <i>S</i> -(6- <i>O</i> -Acetyl- $\beta$ -D-<br>glucopyranosyloxy)docosanoic<br>acid   | <i>I. lutea</i>              | Martyniaceae  | 47          |
| <b>345</b> | 6 <i>S</i> -( $\beta$ -D-<br>Glucopyranosyloxy)octadecanoic<br>acid                     | <i>I. lutea</i>              | Martyniaceae  | 47          |
| <b>346</b> | 6 <i>S</i> -( $\beta$ -D-<br>Glucopyranosyloxy)eicosanoic<br>acid                       | <i>I. lutea</i>              | Martyniaceae  | 47          |
| <b>347</b> | 6 <i>S</i> -( $\beta$ -D-<br>Glucopyranosyloxy)docosanoic<br>acid                       | <i>I. lutea</i>              | Martyniaceae  | 47          |
| <b>348</b> | 8 <i>S</i> -(6- <i>O</i> -Acetyl- $\beta$ -D-<br>glucopyranosyloxy)eicosanoic<br>acid   | <i>Proboscidea louisiana</i> | Martyniaceae  | 47          |
| <b>349</b> | 8 <i>S</i> -(6- <i>O</i> -Acetyl- $\beta$ -D-<br>glucopyranosyloxy)docosanoic<br>acid   | <i>P. louisiana</i>          | Martyniaceae  | 47          |



|                |                                                                                                                       |                               |              |    |
|----------------|-----------------------------------------------------------------------------------------------------------------------|-------------------------------|--------------|----|
| <b>350</b>     | 8 <i>S</i> -( $\beta$ -D-Glucopyranosyloxy)icosanoic acid                                                             | <i>P. louisiana</i>           | Martyniaceae | 47 |
| <b>351</b>     | 8 <i>S</i> -( $\beta$ -D-Glucopyranosyloxy)docosanoic acid                                                            | <i>P. louisiana</i>           | Martyniaceae | 47 |
| <b>352</b>     | 2- <i>O</i> -Acetyl-3- <i>O</i> -isobutyryl-4- <i>O</i> -isocaprylglucopyranose                                       | <i>Solanum</i> spp.           | Solanaceae   | 71 |
| <b>353</b>     | 3'- <i>O</i> -Hexanoyl glucose                                                                                        | <i>Datura wrightii</i>        | Solanaceae   | 72 |
| <b>354-359</b> | Tri- <i>O</i> -acyl- $\alpha$ -D-glucopyranosyl- $\beta$ -D-fructofuranosides                                         | <i>Nicotiana attenuata</i>    | Solanaceae   | 73 |
| <b>360-364</b> | Tri- <i>O</i> -acyl- $\alpha$ -D-glucopyranosyl-( <i>O</i> -acetyl)- $\beta$ -D-fructofuranosides                     | <i>N. attenuata</i>           | Solanaceae   | 73 |
| <b>365-368</b> | ( <i>O</i> -Acetyl-tri- <i>O</i> -acyl)- $\alpha$ -D-glucopyranosyl-( <i>O</i> -Acetyl)- $\beta$ -D-fructofuranosides | <i>N. attenuata</i>           | Solanaceae   | 73 |
| <b>369</b>     | 3,4-Di- <i>O</i> -isobutyryl-6- <i>O</i> -caprylsucrose                                                               | <i>Solanum berthaultii</i>    | Solanaceae   | 74 |
| <b>370</b>     | 6- <i>O</i> -Capryl-3,3',4-tri- <i>O</i> -isobutyrylsucrose                                                           | <i>S. berthaultii</i>         | Solanaceae   | 75 |
| <b>371</b>     | 6- <i>O</i> -Capryl-3'- <i>O</i> -isobutyryl-3,4-di- <i>O</i> -(2-methylbutyryl)sucrose                               | <i>S. berthaultii</i>         | Solanaceae   | 75 |
| <b>372</b>     | 2- <i>O</i> -Acetyl-3'- <i>O</i> -hexanoyl-3,4-di- <i>O</i> -isobutyrylsucrose                                        | <i>S. neocurdenusii</i>       | Solanaceae   | 76 |
| <b>373</b>     | 2- <i>O</i> -Acetyl-3',4-di- <i>O</i> -hexanoyl-3- <i>O</i> -isobutyrylsucrose                                        | <i>S. neocurdenusii</i>       | Solanaceae   | 76 |
| <b>374</b>     | 2- <i>O</i> -Acetyl-3'- <i>O</i> -decanoyl-3,4-di- <i>O</i> -isobutyrylsucrose                                        | <i>S. neocurdenusii</i>       | Solanaceae   | 76 |
| <b>375</b>     | 2,4,1'-Tri- <i>O</i> -(3-methylbutyryl)-3- <i>O</i> -(2-methylbutyryl)sucrose                                         | <i>Lycopersicon hirsutum</i>  | Solanaceae   | 77 |
| <b>376</b>     | 2- <i>O</i> -Acetyl-3- <i>O</i> -isobutyryl-3'- <i>O</i> -isodecanoyl-4- <i>O</i> -(3-methylbutyryl)-sucrose          | <i>L. typicum</i>             | Solanaceae   | 78 |
| <b>377</b>     | 2-Acetyl-3,4-di- <i>O</i> -isobutyryl-3'- <i>O</i> -isodecanoyl sucrose                                               | <i>L. typicum</i>             | Solanaceae   | 78 |
| <b>378</b>     | 2- <i>O</i> -Acetyl-4,3'-di- <i>O</i> -(3-methylbutyryl)-3- <i>O</i> -(2-methylbutyryl)sucrose                        | <i>L. typicum</i>             | Solanaceae   | 78 |
| <b>379</b>     | 2- <i>O</i> -Acetyl-3,4,3'-tri- <i>O</i> -isobutyrylsucrose                                                           | <i>L. typicum</i>             | Solanaceae   | 78 |
| <b>380</b>     | 1',6'-Diacyl-2,3,4,6-tetra(3-methyl valerianyl)-sucrose                                                               | <i>Salpichroa organifolia</i> | Solanaceae   | 79 |

|            |                                                                                                                                                                               |                                |                 |    |
|------------|-------------------------------------------------------------------------------------------------------------------------------------------------------------------------------|--------------------------------|-----------------|----|
| <b>381</b> | 2-Acetyl-1-{3-[3,4-di- <i>O</i> -acetyl- $\beta$ -D-glucopyranosyl-(1 $\rightarrow$ 3)-2- <i>O</i> -acetyl- $\alpha$ -L-rhamnopyranosyloxy]octadecanoyl}- <i>sn</i> -glycerol | <i>Cerasus yedoensis</i>       | Rosaceae        | 46 |
| <b>382</b> | Pelargoside A1                                                                                                                                                                | <i>Erodium pelargoniflorum</i> | Geraniaceae     | 80 |
| <b>383</b> | Pelargoside B1                                                                                                                                                                | <i>E. pelargoniflorum</i>      | Geraniaceae     | 80 |
| <b>384</b> | Pelargoside A2                                                                                                                                                                | <i>E. pelargoniflorum</i>      | Geraniaceae     | 80 |
| <b>385</b> | Pelargoside A3                                                                                                                                                                | <i>E. pelargoniflorum</i>      | Geraniaceae     | 80 |
| <b>386</b> | Pelargoside A4                                                                                                                                                                | <i>E. pelargoniflorum</i>      | Geraniaceae     | 80 |
| <b>387</b> | Pelargoside B2                                                                                                                                                                | <i>E. pelargoniflorum</i>      | Geraniaceae     | 80 |
| <b>388</b> | Pelargoside B3                                                                                                                                                                | <i>E. pelargoniflorum</i>      | Geraniaceae     | 80 |
| <b>389</b> | Pelargoside B4                                                                                                                                                                | <i>E. pelargoniflorum</i>      | Geraniaceae     | 80 |
| <b>390</b> | Caroliniaside A                                                                                                                                                               | <i>E. pelargoniflorum</i>      | Geraniaceae     | 81 |
| <b>391</b> | Caroliniaside B                                                                                                                                                               | <i>E. pelargoniflorum</i>      | Geraniaceae     | 81 |
| <b>392</b> | Caroliniaside C                                                                                                                                                               | <i>E. pelargoniflorum</i>      | Geraniaceae     | 81 |
| <b>393</b> | Gallicaside A                                                                                                                                                                 | <i>Silene gallica</i>          | Caryophyllaceae | 82 |
| <b>394</b> | Gallicaside C                                                                                                                                                                 | <i>S. gallica</i>              | Caryophyllaceae | 82 |
| <b>395</b> | Gallicaside F                                                                                                                                                                 | <i>S. gallica</i>              | Caryophyllaceae | 82 |
| <b>396</b> | Gallicaside I                                                                                                                                                                 | <i>S. gallica</i>              | Caryophyllaceae | 82 |
| <b>397</b> | Gallicaside B                                                                                                                                                                 | <i>S. gallica</i>              | Caryophyllaceae | 82 |
| <b>398</b> | Gallicaside D                                                                                                                                                                 | <i>S. gallica</i>              | Caryophyllaceae | 82 |
| <b>399</b> | Gallicaside E                                                                                                                                                                 | <i>S. gallica</i>              | Caryophyllaceae | 82 |
| <b>400</b> | Gallicaside G                                                                                                                                                                 | <i>S. gallica</i>              | Caryophyllaceae | 82 |
| <b>401</b> | Gallicaside H                                                                                                                                                                 | <i>S. gallica</i>              | Caryophyllaceae | 82 |
| <b>402</b> | Gallicaside J                                                                                                                                                                 | <i>S. gallica</i>              | Caryophyllaceae | 82 |
| <b>403</b> | Glomeraside A                                                                                                                                                                 | <i>Cerastium glomeratum</i>    | Caryophyllaceae | 83 |
| <b>404</b> | Glomeraside D                                                                                                                                                                 | <i>C. glomeratum</i>           | Caryophyllaceae | 83 |
| <b>405</b> | Glomeraside F                                                                                                                                                                 | <i>C. glomeratum</i>           | Caryophyllaceae | 83 |
| <b>406</b> | Glomeraside I                                                                                                                                                                 | <i>C. glomeratum</i>           | Caryophyllaceae | 83 |
| <b>407</b> | Glomeraside K                                                                                                                                                                 | <i>C. glomeratum</i>           | Caryophyllaceae | 83 |
| <b>408</b> | Glomeraside M                                                                                                                                                                 | <i>C. glomeratum</i>           | Caryophyllaceae | 83 |
| <b>409</b> | Glomeraside B                                                                                                                                                                 | <i>C. glomeratum</i>           | Caryophyllaceae | 83 |
| <b>410</b> | Glomeraside E                                                                                                                                                                 | <i>C. glomeratum</i>           | Caryophyllaceae | 83 |
| <b>411</b> | Glomeraside G                                                                                                                                                                 | <i>C. glomeratum</i>           | Caryophyllaceae | 83 |
| <b>412</b> | Glomeraside J                                                                                                                                                                 | <i>C. glomeratum</i>           | Caryophyllaceae | 83 |
| <b>413</b> | Glomeraside L                                                                                                                                                                 | <i>C. glomeratum</i>           | Caryophyllaceae | 83 |
| <b>414</b> | Glomeraside N                                                                                                                                                                 | <i>C. glomeratum</i>           | Caryophyllaceae | 83 |
| <b>411</b> | Glomeraside C                                                                                                                                                                 | <i>C. glomeratum</i>           | Caryophyllaceae | 83 |
| <b>416</b> | Glomeraside H                                                                                                                                                                 | <i>C. glomeratum</i>           | Caryophyllaceae | 83 |

**Table S9. Names and sources of glycerides 417-483.**

| No.     | Names                                                                                                       | Species                                                 | Family           | Ref.      |
|---------|-------------------------------------------------------------------------------------------------------------|---------------------------------------------------------|------------------|-----------|
| 417     |                                                                                                             | <i>Ceratotheca triloba</i>                              | Pedaliaceae      | 84        |
| 418     | 1- <i>O</i> -Acetyl-2- <i>O</i> -[( <i>R</i> )-(3-acetyloxyoctadecanoyl)-3- <i>O</i> -malonylglycerol       | <i>C. triloba</i>                                       | Pedaliaceae      | 84        |
| 419-422 |                                                                                                             | <i>C. triloba</i>                                       | Pedaliaceae      | 84        |
| 423     | 1- <i>O</i> -Acetyl-2- <i>O</i> -[( <i>R</i> )-3-acetyloxyicosanoyl]-3- <i>O</i> -malonylglycerol           | <i>C. triloba</i>                                       | Pedaliaceae      | 84        |
| 424-425 |                                                                                                             | <i>C. triloba</i>                                       | Pedaliaceae      | 84        |
| 426-430 | 2- <i>O</i> -[(3 <i>R</i> ,6 <i>S</i> )-3,6-Diacetyloxyfattyacyl]glycerols                                  | <i>Ibicella lutea</i> ,<br><i>Proboscidea louisiana</i> | Martyniaceae     | 47        |
| 431-435 | 2- <i>O</i> -[(3 <i>R</i> )-3-Acetyloxyfattyacyl]glycerols                                                  | <i>I. lutea</i> , <i>P. louisiana</i>                   | Martyniaceae     | 47        |
| 436-440 | 2- <i>O</i> -[(3 <i>R</i> ,6 <i>S</i> )-3,6-Diacetyloxyfattyacyl]glycerols                                  | <i>I. lutea</i> , <i>P. louisiana</i>                   | Martyniaceae     | 47        |
| 441-445 | 2- <i>O</i> -[(3 <i>R</i> )-3-Acetyloxyfattyacyl]glycerols                                                  | <i>I. lutea</i> , <i>P. louisiana</i>                   | Martyniaceae     | 47        |
| 446-449 | 2- <i>O</i> -[(3 <i>R</i> ,6 <i>S</i> )-3,6-Diacetyloxyfattyacyl]glycerols                                  | <i>I. lutea</i> , <i>P. louisiana</i>                   | Martyniaceae     | 47        |
| 450     | 1- <i>O</i> -Acetyl-3- <i>O</i> -[( <i>R</i> )-3-Hydroxytetradecanoyl]glycerol                              | <i>Verbascum blattaria</i><br><i>f. erubescens</i>      | Scrophulariaceae | 85        |
| 451     | 1- <i>O</i> -Acetyl-3- <i>O</i> -[( <i>R</i> )-3-Hydroxyhexadecanoyl]glycerol                               | <i>V. blattaria f.</i><br><i>erubescens</i>             | Scrophulariaceae | 85        |
| 452     | 2- <i>O</i> -(3-Hydroxytetradecanoyl)glycerol                                                               | <i>V. blattaria f.</i><br><i>erubescens</i>             | Scrophulariaceae | 85        |
| 453     | 2- <i>O</i> -(3-Hydroxyhexadecanoyl)glycerol                                                                | <i>V. blattaria f.</i><br><i>erubescens</i>             | Scrophulariaceae | 85        |
| 454     | 1,3-di- <i>O</i> -Acetyl-2- <i>O</i> -[(3 <i>R</i> ,6 <i>S</i> )-3-(acetyloxy)-6-hydroxyeicosanoyl]glycerol | <i>Paulownia tomentosa</i>                              | Scrophulariaceae | 86,<br>87 |
| 455     | 2- <i>O</i> -[(3 <i>R</i> )-3-(Acetyloxy)octadecanoyl]glycerol                                              | <i>P. tomentosa</i>                                     | Scrophulariaceae | 86,<br>87 |
| 456     | 2- <i>O</i> -[(3 <i>R</i> )-3-(Acetyloxy)eicosanoyl]glycerol                                                | <i>P. tomentosa</i>                                     | Scrophulariaceae | 86,<br>87 |
| 457     | 1- <i>O</i> -Acetyl-2- <i>O</i> -[(3 <i>R</i> )-3-(acetyloxy)octadecanoyl]- <i>sn</i> -                     | <i>P. tomentosa</i>                                     | Scrophulariaceae | 86,<br>87 |

---

|            |                                                                                                     |                     |                  |           |
|------------|-----------------------------------------------------------------------------------------------------|---------------------|------------------|-----------|
|            | glycerol                                                                                            |                     |                  |           |
| <b>458</b> | 1- <i>O</i> -Acetyl-2- <i>O</i> -[(3R)-3-(acetyloxy)eicosanoyl]- <i>sn</i> -glycerol                | <i>P. tomentosa</i> | Scrophulariaceae | 86,<br>87 |
| <b>459</b> | 1- <i>O</i> -Acetyl-2- <i>O</i> -[(3R,7R)-3,7-bis(acetyloxy)octadecanoyl]- <i>sn</i> -glycerol      | <i>P. tomentosa</i> | Scrophulariaceae | 86,<br>87 |
| <b>460</b> | 1- <i>O</i> -Acetyl-2- <i>O</i> -[(3R,6S)-3,6-bis(acetyloxy)eicosanoyl]- <i>sn</i> -glycerol        | <i>P. tomentosa</i> | Scrophulariaceae | 86,<br>87 |
| <b>461</b> | 1- <i>O</i> -Acetyl-2- <i>O</i> -[(3R,7R)-3,7-bis(acetyloxy)eicosanoyl]- <i>sn</i> -glycerol        | <i>P. tomentosa</i> | Scrophulariaceae | 86,<br>87 |
| <b>462</b> | 1- <i>O</i> -Acetyl-2- <i>O</i> -[(3R,6S)-3-(acetyloxy)-6-hydroxyoctadecanoyl]- <i>sn</i> -glycerol | <i>P. tomentosa</i> | Scrophulariaceae | 86,<br>87 |
| <b>463</b> | 1- <i>O</i> -Acetyl-2- <i>O</i> -[(3R,6S)-3-(acetyloxy)-6-hydroxyeicosanoyl]- <i>sn</i> -glycerol   | <i>P. tomentosa</i> | Scrophulariaceae | 86,<br>87 |
| <b>464</b> | 1- <i>O</i> -Acetyl-2- <i>O</i> -[(3R,8R)-3,8-bis(acetyloxy)eicosanoyl]- <i>sn</i> -glycerol        | <i>P. tomentosa</i> | Scrophulariaceae | 86,<br>87 |
| <b>465</b> | 1- <i>O</i> -Acetyl-2- <i>O</i> -[(3R,9R)-3,9-bis(acetyloxy)eicosanoyl]- <i>sn</i> -glycerol        | <i>P. tomentosa</i> | Scrophulariaceae | 86,<br>87 |
| <b>466</b> | 1- <i>O</i> -Acetyl-2- <i>O</i> -[(3R,8R)-3-(acetyloxy)-8-hydroxyeicosanoyl]- <i>sn</i> -glycerol   | <i>P. tomentosa</i> | Scrophulariaceae | 86,<br>87 |
| <b>467</b> | 1- <i>O</i> -Acetyl-2- <i>O</i> -[(3R,9R)-3-(acetyloxy)-9-hydroxyeicosanoyl]- <i>sn</i> -glycerol   | <i>P. tomentosa</i> | Scrophulariaceae | 86,<br>87 |
| <b>468</b> | 2- <i>O</i> -[(3R,7R)-3,7-bis(Acetyloxy)octadecanoyl]glycerol                                       | <i>P. tomentosa</i> | Scrophulariaceae | 86,<br>87 |
| <b>469</b> | 2- <i>O</i> -[(3R,8R)-3,8-bis-(Acetyloxy)octadecanoyl]glycerol                                      | <i>P. tomentosa</i> | Scrophulariaceae | 86,<br>87 |
| <b>470</b> | 2- <i>O</i> -[(3R,8R)-3,8-bis(Acetyloxy)eicosanoyl]glycerol                                         | <i>P. tomentosa</i> | Scrophulariaceae | 86,<br>87 |
| <b>471</b> | 2- <i>O</i> -[(3R,6S)-3-(Acetyloxy)-6-hydroxyoctadecanoyl]glycerol                                  | <i>P. tomentosa</i> | Scrophulariaceae | 86,<br>87 |
| <b>472</b> | 2- <i>O</i> -[(3R,8R)-3-(Acetyloxy)-8-hydroxyoctadecanoyl]glycerol                                  | <i>P. tomentosa</i> | Scrophulariaceae | 86,<br>87 |

---

|     |                                                                    |                     |                  |           |
|-----|--------------------------------------------------------------------|---------------------|------------------|-----------|
| 473 | 2- <i>O</i> -[(3R,6S)-3-(Acetyloxy)-6-hydroxyeicosanoyl]glycerol   | <i>P. tomentosa</i> | Scrophulariaceae | 86,<br>87 |
| 474 | 2- <i>O</i> -[(3R,8R)-3-(Acetyloxy)-8-hydroxyeicosanoyl]glycerol   | <i>P. tomentosa</i> | Scrophulariaceae | 86,<br>87 |
| 475 | 2- <i>O</i> -[(3R,9R)-3,9-bis(Acetyloxy)eicosanoyl]glycerol        | <i>P. tomentosa</i> | Scrophulariaceae | 86,<br>87 |
| 476 | 2- <i>O</i> -[(3R,7R)-3-(Acetyloxy)-7-hydroxyoctadecanoyl]glycerol | <i>P. tomentosa</i> | Scrophulariaceae | 86,<br>87 |
| 477 | 2- <i>O</i> -[(3R,9R)-3-(Acetyloxy)-9-hydroxyoctadecanoyl]glycerol | <i>P. tomentosa</i> | Scrophulariaceae | 86,<br>87 |
| 478 | 2- <i>O</i> -[(3R,7R)-3-(Acetyloxy)-7-hydroxyeicosanoyl]glycerol   | <i>P. tomentosa</i> | Scrophulariaceae | 86,<br>87 |
| 479 | 2- <i>O</i> -[(3R,9R)-3-(Acetyloxy)-9-hydroxyeicosanoyl]glycerol   | <i>P. tomentosa</i> | Scrophulariaceae | 86,<br>87 |
| 480 | 2- <i>O</i> -[(3R,6S)-3,6-Dihydroxyeicosanoyl]glycerol             | <i>P. tomentosa</i> | Scrophulariaceae | 86,<br>87 |
| 481 | 2- <i>O</i> -[(3R,8R)-3,8-Dihydroxyeicosanoyl]glycerol             | <i>P. tomentosa</i> | Scrophulariaceae | 86,<br>87 |
| 482 | 2- <i>O</i> -[(3R,7R)-3,7-Dihydroxyeicosanoyl]glycerol             | <i>P. tomentosa</i> | Scrophulariaceae | 86,<br>87 |
| 483 | 2- <i>O</i> -[(3R,9R)-3,9-Dihydroxyeicosanoyl]glycerol             | <i>P. tomentosa</i> | Scrophulariaceae | 86,<br>87 |

**Table S10. Names and sources of alkaloids 484-489.**

| No. | Names                                           | Species                  | Family     | Ref. |
|-----|-------------------------------------------------|--------------------------|------------|------|
| 484 | <i>N</i> -Hydroxydodecanoic acid normicotine    | <i>Nicotiana repanda</i> | Solanaceae | 88   |
| 485 | <i>N</i> -Hydroxy-tridecanoic acid normicotine  | <i>N. repanda</i>        | Solanaceae | 88   |
| 486 | <i>N</i> -Hydroxytetradecanoic acid normicotine | <i>N. repanda</i>        | Solanaceae | 88   |
| 487 | <i>N</i> -Hydroxypentanoic acid normicotine     | <i>N. repanda</i>        | Solanaceae | 88   |
| 488 | <i>N</i> -Undecanoic acid normicotine           | <i>N. repanda</i>        | Solanaceae | 88   |
| 489 | <i>N</i> -Dodecanoic acid normicotine           | <i>N. repanda</i>        | Solanaceae | 88   |

#### References:

- 1 O. Spring, U. Rodon and F. A. Macias, *Phytochemistry*, 1992, **31**, 1541-1544.
- 2 O. Spring, J. Pfannstiel, I. Klaiber, J. Conrad, U. Beifuss, L. Apel, A.-K. Aschenbrenner and R. Zipper, *Phytochemistry*, 2015, **119**, 83-89.
- 3 O. Spring, N. Heil and B. Vogler, *Phytochemistry*, 1997, **46**, 1369-1373.
- 4 O. Spring, D. Vargas and N. H. Fischer, *Phytochemistry*, 1991, **30**, 1861-1867.
- 5 F. F. Chen, F. H. Hao, C. F. Li, J. B. Gou, D. Y. Lu, F. J. Gong, H. R. Tang and Y. S. Zhang, *PLoS One*, 2013, **8**, e76621.

- 6 E. M. Cappelletti, R. Caniato and G. Appendino, *Biochem. Syst. Ecol.*, 1986, **14**, 183-190.
- 7 O. Spring, R. Zipper, B. Vogler, J. L. C. Lopes, W. Vichnewski, D. A. Dias and W. R. Cunha, *Phytochemistry*, 1999, **52**, 79-85.
- 8 O. Spring, *Phytochemistry*, 1991, **30**, 519-522.
- 9 O. Spring, R. Zipper, J. Conrad, B. Vogler, I. Klaiber and F. B. Da Costa, *Phytochemistry*, 2003, **62**, 1185-1189.
- 10 O. Spring, R. Zipper and S. Reed, *Phytochemistry*, 2001.
- 11 K. Schorr, A. J. Garcia-Pineros, B. Siedle, I. Merfort and F. B. Da Costa, *Phytochemistry*, 2002, **60**, 733-740.
- 12 L. J. Locken and R. G. Kelsey, *Biochem. Syst. Ecol.*, 1987, **15**, 313-320.
- 13 J. C. Gopfert, N. Heil, J. Conrad and O. Spring, *Plant Biol.*, 2005, **7**, 148-155.
- 14 S. R. Ambrosio, Y. Oki, V. C. Heleno, J. S. Chaves, P. G. Nascimento, J. E. Lichston, M. G. Constantino, E. M. Varanda and F. B. Da Costa, *Phytochemistry*, 2008, **69**, 2052-2060.
- 15 A. A. Lopes, E. S. Pina, D. B. Silva, A. M. Pereira, M. F. da Silva, F. B. Da Costa, N. P. Lopes and M. T. Pupo, *Chem. Commun.*, 2013, **49**, 9989-9991.
- 16 M. Majdi, Q. Liu, G. Karimzadeh, M. A. Malboobi, J. Beekwilder, K. Cankar, R. Vos, S. Todorovic, A. Simonovic and H. Bouwmeester, *Phytochemistry*, 2011, **72**, 1739-1750.
- 17 O. Spring, R. Zipper, I. Klaiber, S. Reeb and B. Vogler, *Phytochemistry*, 2000, **55**, 255-261.
- 18 O. Spring, T. Benz and M. Ilg, *Phytochemistry*, 1989, **28**, 745-749.
- 19 B. M. Hausen and O. Spring, *Contact Dermatitis*, 1989, **20**, 326-334.
- 20 F. Favi, Charles L. Cantrell, T. Mebrahtu and Mark E. Kraemer, *Int. J Plant Sci.*, 2008, **169**, 605-614.
- 21 B. Appezzato-da-Glória, F. B. Da Costa, V. C. da Silva, L. Gobbo-Neto, V. L. G. Rehder and A. H. Hayashi, *Flora*, 2012, **207**, 878-887.
- 22 M. V. Duke, R. N. Paul, H. N. Elsohly, G. Sturtz and S. O. Duke, *Int. J Plant Sci.*, 1994, **155**, 365-372.
- 23 M. Morimoto, C. L. Cantrell, L. Libous-Bailey and S. O. Duke, *Phytochemistry*, 2009, **70**, 69-74.
- 24 E. Rodriguez, B. Sanchez, P. A. Grieco, G. Majetich and T. Oguri, *Phytochemistry*, 1979, **18**, 1741-1742.
- 25 E. Rodriguez, M. O. Dillon, T. J. Mabry, J. C. Mitchell and G. H. Towers, *Experientia*, 1976, **32**, 236-238.
- 26 R. G. Kelsey and F. Shafizadeh, *Biochem. Syst. Ecol.*, 1980, **8**, 371-377.
- 27 T. Asai, Y. Hirayama and Y. Fujimoto, *Phytochem. Lett.*, 2012, **5**, 376-378.
- 28 E. A. P. Ekanayaka, C. Li and A. D. Jones, *Phytochemistry*, 2014, **98**, 223-231.
- 29 A. R. Jassbi, S. Zare, M. Asadollahi and M. C. Schuman, *Chem. Rev.*, 2017, **117**, 12227-12280.
- 30 E. Wang, R. Wang, J. DeParasis, J. H. Loughrin, S. Gan and G. J. Wagner,

- Nat. Biotechnol.*, 2001, **19**, 371-374.
- 31 X. Chen, A. Berim, F. E. Dayan and D. R. Gang, *J. Exp. Bot.*, 2017, **68**, 1109-1122.
- 32 C. Sallaud, C. Giacalone, R. Topfer, S. Goepfert, N. Bakaher, S. Rosti and A. Tissier, *Plant J.*, 2012, **72**, 1-17.
- 33 N. Gunnewich, Y. Higashi, X. Feng, K. B. Choi, J. Schmidt and T. M. Kutchan, *Phytochemistry*, 2013, **91**, 93-99.
- 34 Y. Wang, S.-H. Luo, J. Hua, Y. Liu, S.-X. Jing, X.-N. Li and S.-H. Li, *J. Agric. Food Chem.*, 2015, **63**, 10004-10012.
- 35 C.-J. Xiao, Y.-C. Liu, S.-H. Luo, J. Hua, Y. Liu and S.-H. Li, *Phytochem. Anal.*, 2017, **28**, 404-409.
- 36 A. M. Heskes, T. C. M. Sundram, B. A. Boughton, N. B. Jensen, N. L. Hansen, C. Crocoll, F. Cozzi, S. Rasmussen, B. Hamberger, B. Hamberger, D. Staerk, B. L. Moller and I. Pateraki, *Plant J.*, 2018, **93**, 943-958.
- 37 C.-H. Li, Y. Liu, J. Hua, S.-H. Luo and S.-H. Li, *J. Integr. Plant Biol.*, 2014, **56**, 928-940.
- 38 A. Bisio, A. Corallo, P. Gastaldo, G. Romussi, G. Ciarallo, N. Fontana, N. De Tommasi and P. Profumo, *Ann. Bot.*, 1999, **83**, 441-452.
- 39 D. J. Siebert, *Ann. Bot.*, 2004, **93**, 763-771.
- 40 K. Brueckner, D. Bozic, D. Manzano, D. Papaefthimiou, I. Pateraki, U. Scheler, A. Ferrer, R. C. H. de Vos, A. K. Kanellis and A. Tissier, *Phytochemistry*, 2014, **101**, 52-64.
- 41 R. E. Robles-Zepeda, E. Lozoya-Gloria, M. G. Lopez, M. L. Villarreal, E. Ramirez-Chavez and J. Molina-Torres, *Fitoterapia*, 2009, **80**, 12-17.
- 42 H. Kakuta, T. Seki, Y. Hashidoko and J. Mizutani, *Biosci. Biotechnol. Biochem.*, 1992, **56**, 1562-1564.
- 43 S.-H. Luo, Q. Luo, X.-M. Niu, M.-J. Xie, X. Zhao, B. Schneider, J. Gershenzon and S.-H. Li, *Angew. Chem., Int. Ed.*, 2010, **49**, 4471-4475.
- 44 Y. Liu, S. H. Luo, A. Schmidt, G. D. Wang, G. L. Sun, M. Grant, C. Kuang, M. J. Yang, S. X. Jing, C. H. Li, B. Schneider, J. Gershenzon and S. H. Li, *Plant Cell*, 2016, **28**, 804-822.
- 45 C.-H. Li, S.-X. Jing, S.-H. Luo, W. Shi, J. Hua, Y. Liu, X.-N. Li, B. Schneider, J. Gershenzon and S.-H. Li, *Org. Lett.*, 2013, **15**, 1694-1697.
- 46 T. Asai and Y. Fujimoto, *Phytochem. Lett.*, 2011, **4**, 38-42.
- 47 T. Asai, N. Hara and Y. Fujimoto, *Phytochemistry*, 2010, **71**, 877-894.
- 48 O. J. Raatikainen, H. T. Taipale, A. Pelttari and S. P. Lapinjoki, *New Phytologist*, 1992, **122**, 537-543.
- 49 N. Happyana, S. Agnolet, R. Muntendam, A. Van Dam, B. Schneider and O. Kayser, *Phytochemistry*, 2013, **87**, 51-59.
- 50 T. Peresse, N. Elie, D. Touboul, V. C. Pham, V. Dumontet, F. Roussi, M. Litaudon and A. Brunelle, *Anal. Chem.*, 2017, **89**, 9247-9252.
- 51 G. W. Reynolds and E. Redriguez, *Phytochemistry*, 1981, **20**, 1365-1366.

- 52 G. W. Reynolds and E. Rodriguez, *Phytochemistry*, 1986, **25**, 1617-1619.
- 53 G. Reynolds and E. Rodriguez, *Phytochemistry*, 1979, **18**, 1567-1568.
- 54 G. W. Reynolds and E. Rodriguez, *Planta Med.*, 1981, **43**, 187-193.
- 55 R. S. Ersser, *J. Chromatogr.*, 1975, **115**, 612-615.
- 56 D. L. Gerhold, R. Craig and R. O. Mumma, *J. Chem. Ecol.*, 1984, **10**, 713-722.
- 57 D. S. Walters, R. Minard, R. Craig and R. O. Mumma, *J. Chem. Ecol.*, 1988, **14**, 743-751.
- 58 D. J. Schultz, E. B. Cahoon, J. Shanklin, R. Craig, D. L. CoxFoster, R. O. Mumma and J. I. Medford, *Proc. Natl. Acad. Sci. U. S. A.*, 1996, **93**, 8771-8775.
- 59 D. J. Schultz, C. Olsen, G. A. Cobbs, N. J. Stolowich and M. M. Parrott, *J. Agric. Food Chem.*, 2006, **54**, 7522-7529.
- 60 W. Horper and F. J. Marner, *Phytochemistry*, 1996, **41**, 451-456.
- 61 E. Wollenweber, J. F. Stevens, M. Ivanic and M. L. Deinzer, *Phytochemistry*, 1998, **48**, 931-939.
- 62 F. J. Arriaga-Giner, E. Wollenweber, I. Schober and G. Yatskievych, *Z. Naturforsch., C: J. Biosci.*, 1988, **43**, 337-340.
- 63 E. Wollenweber, M. Dorr, R. Stelzer and F. J. Arriagaginer, *Bot. Acta*, 1992, **105**, 300-305.
- 64 G. Wang, L. Tian, N. Aziz, P. Broun, X. Dai, J. He, A. King, P. X. Zhao and R. A. Dixon, *Plant Physiol.*, 2008, **148**, 1254-1266.
- 65 E. Valkama, *Ann. Bot.*, 2003, **91**, 643-655.
- 66 E. E. Schilling, *Biochem. Syst. Ecol.*, 1983, **11**, 341-344.
- 67 L. Gobbo-Neto, P. J. Gates and N. P. Lopes, *Rapid Commun. Mass Spectrom.*, 2008, **22**, 3802-3808.
- 68 L. Mendoza and A. Urzúa, *Biochem. Syst. Ecol.*, 1998, **26**, 469-471.
- 69 B. Liu, J.-C. Wu, H.-L. Li, Y.-F. Ma, Y.-P. Luo, G.-L. Huang, X.-J. Tian and Y.-G. Chen, *Chem. Nat. Compd.*, 2016, **52**, 902-903.
- 70 T. Asai, N. Hara, S. Kobayashi, S. Kohshima and Y. Fujimoto, *Phytochemistry*, 2008, **69**, 1234-1241.
- 71 R. R. King, L. A. Calhoun and R. P. Singh, *Phytochemistry*, 1988, **27**, 3765-3768.
- 72 N. M. Van Dam and J. D. Hare, *J. Chem. Ecol.*, 1998, **24**, 1529-1549.
- 73 V. T. Luu, A. Weinhold, C. Ullah, S. Dressel, M. Schoettner, K. Gase, E. Gaquerel, S. Xu and I. T. Baldwin, *Plant Physiol.*, 2017, **174**, 370-386.
- 74 R. R. King, Y. Pelletier, R. P. Singh and L. A. Calhoun, *J. Chem. Soc., Chem. Commun.*, 1986, 1078-1079.
- 75 R. R. King, R. P. Singh and L. A. Calhoun, *Carbohydr. Res.*, 1987, **166**, 113-121.
- 76 R. R. King, R. P. Singh and L. A. Calhoun, *Carbohydr. Res.*, 1988, **173**, 235-241.
- 77 R. R. King, L. A. Calhoun, R. P. Singh and A. Boucher, *Phytochemistry*, 1990,



- 29, 2115-2118.
- 78 R. R. King, L. A. Calhoun, R. P. Singh and A. Boucher, *J. Agric. Food Chem.*, 1993, **41**, 469-473.
- 79 C. Dutra, M. V. Cesio, P. Moyna and H. Heinzen, *Nat. Prod. Commun.*, 2008, **3**, 539-542.
- 80 T. Sakai, Y. Tanemura, S. Itoh and Y. Fujimoto, *Chem. Biodiversity*, 2013, **10**, 1099-1108.
- 81 T. Asai, T. Sakai, K. Ohyama and Y. Fujimoto, *Chem. Pharm. Bull.*, 2011, **59**, 747-752.
- 82 T. Asai and Y. Fujimoto, *Phytochemistry*, 2010, **71**, 1410-1417.
- 83 T. Asai, Y. Nakamura, Y. Hirayama, K. Ohyama and Y. Fujimoto, *Phytochemistry*, 2012, **82**, 149-157.
- 84 A. Ohkawa, T. Sakai, K. Ohyama and Y. Fujimoto, *Chem. Biodiver.*, 2012, **9**, 1611-1617.
- 85 A. Okawa, K. Ohyama and Y. Fujimoto, *Nat. Prod. Res.*, 2013, **27**, 1372-1377.
- 86 S. Kobayashi, T. Asai, Y. Fujimoto and S. Kohshima, *Ann. Bot.*, 2008, **101**, 1035-1047.
- 87 T. Asai, N. Hara, S. Kobayashi, S. Kohshima and Y. Fujimoto, *Helv. Chim. Acta*, 2009, **92**, 1473-1494.
- 88 G. Laue, C. A. Preston and I. T. Baldwin, *Planta*, 2000, **210**, 510-514.
